# Supplementary material for: Anticorrosion behaviour and tribological properties of AZ31 magnesium alloy coated with Nb2O5/Nb2O5–Mg/Mg layer by magnetron sputtering
Source: Royal Society of Chemistry journal article supplement (doi:10.1039/d2ra04907d), 2022-01-01
Supplement: d2ra04907d1.pdf [file d2ra04907d1.pdf]

## Anticorrosion behaviour and tribological properties of AZ31 magnesium alloy coated with $\text{Nb}_2\text{O}_5/\text{Nb}_2\text{O}_5\text{-Mg}/\text{Mg}$ layers by magnetron sputtering

Ziyu Ding<sup>a</sup>, Qianhong Yuan<sup>b</sup>, Hao Wang<sup>b</sup>, Yinghong Tang<sup>b</sup>, Yimin Tan<sup>a,\*</sup>, Quanguo He<sup>c,\*</sup>

<sup>a</sup> School of Packaging and Materials Engineering, Hunan University of Technology, Zhuzhou 412007, China

<sup>b</sup> School of Mechanical Engineering, Hunan University of Technology, Zhuzhou 412007, China

<sup>c</sup> School of Life Sciences and Chemistry, Hunan University of Technology, Zhuzhou 412007, China

Electronic Supplementary Material (ESI) for RSC Advances.

This journal is © The Royal Society of Chemistry 2022

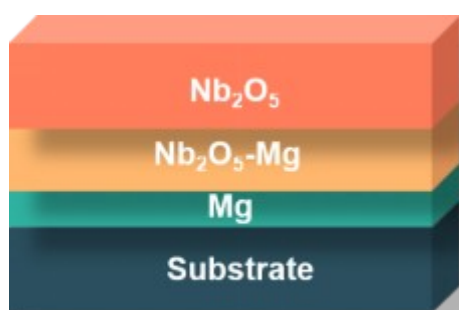

**Figure S1.** Structural model of M- $\text{Nb}_2\text{O}_5$  multilayer coating.

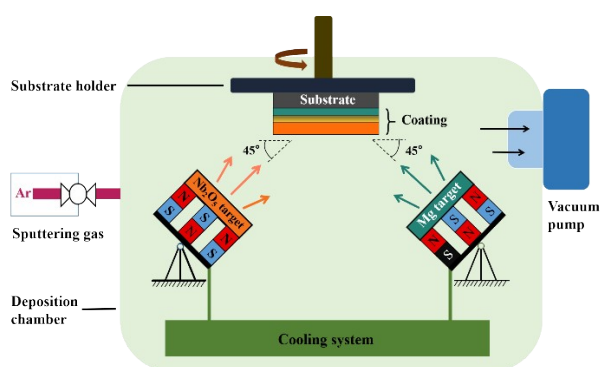

**Figure S2.** Schematic illustration of the magnetron sputtering system.

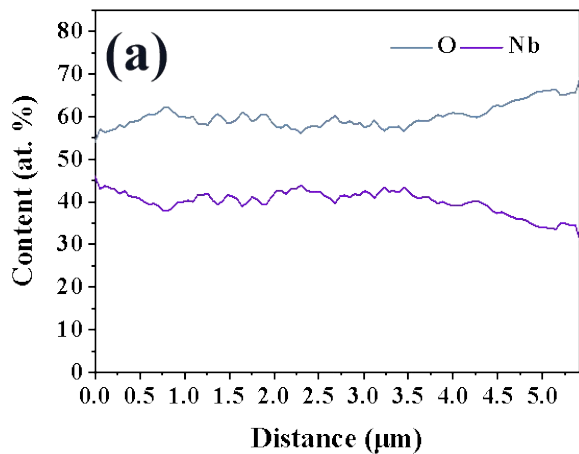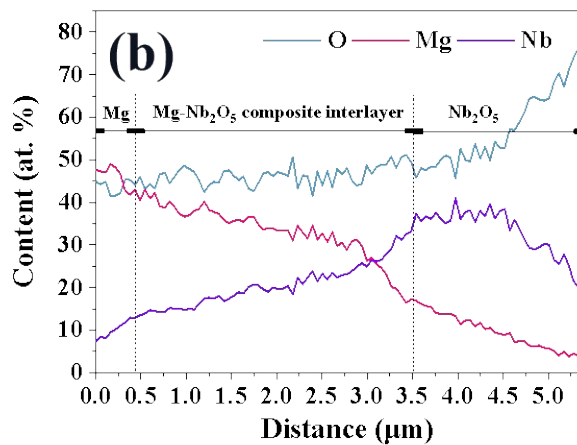

Figure S3. Cross-sectional EDS line scanning of the films: (a)  $\text{Nb}_2\text{O}_5$ , (b)  $\text{M-Nb}_2\text{O}_5$ .

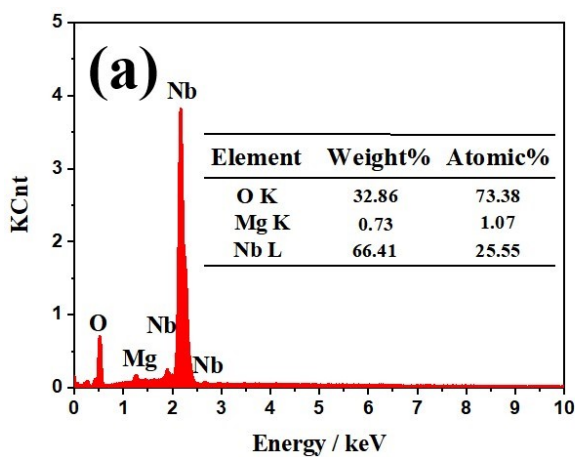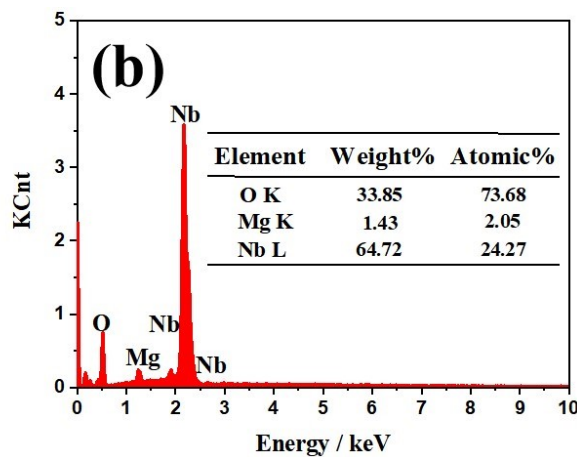

Figure S4. Surface EDS analysis of the layers: (a)  $\text{Nb}_2\text{O}_5$ , (b)  $\text{M-Nb}_2\text{O}_5$ .

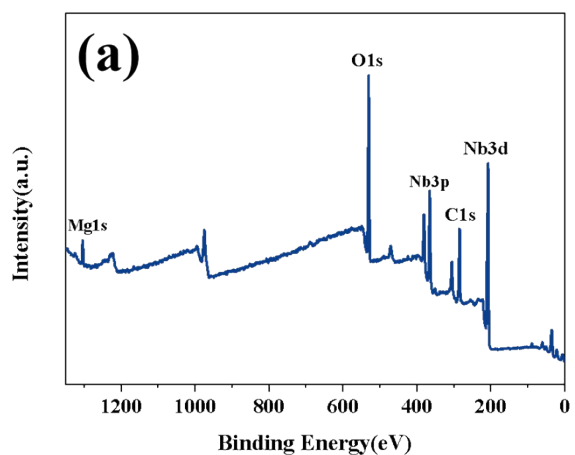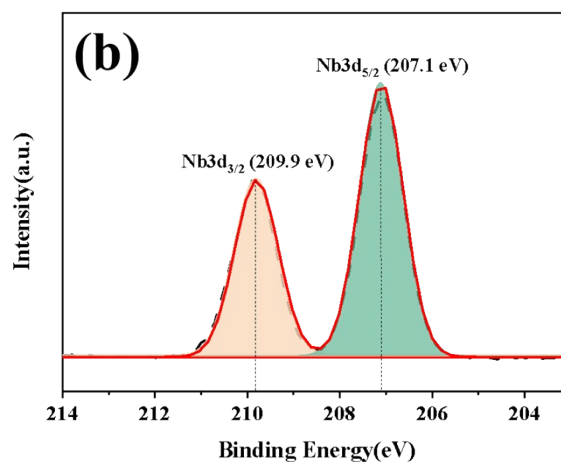

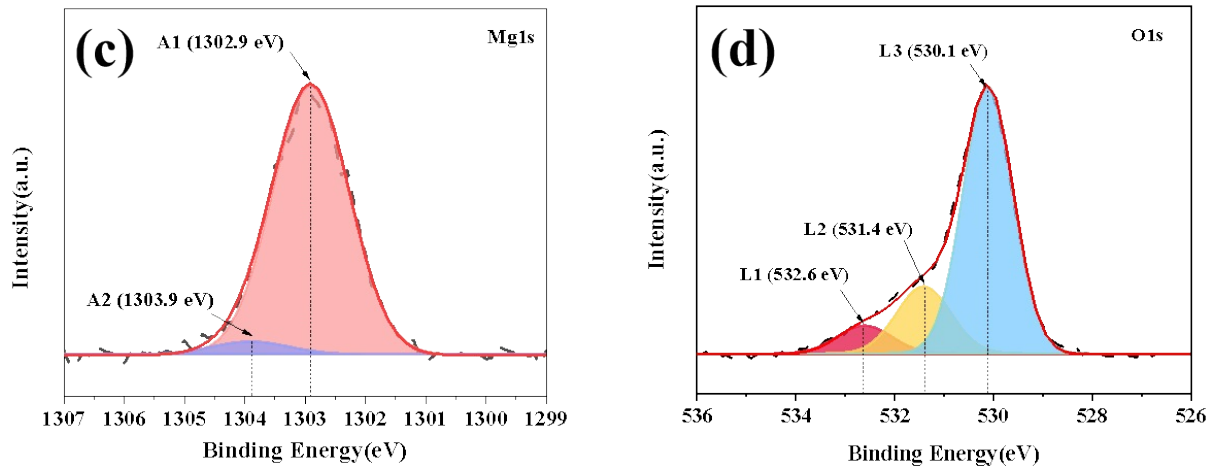

Figure S5. (a) XPS survey spectrum of M-Nb<sub>2</sub>O<sub>5</sub> coating and fine spectra of (b) Nb 3d, (c) Mg 1s and (d) O 1s.

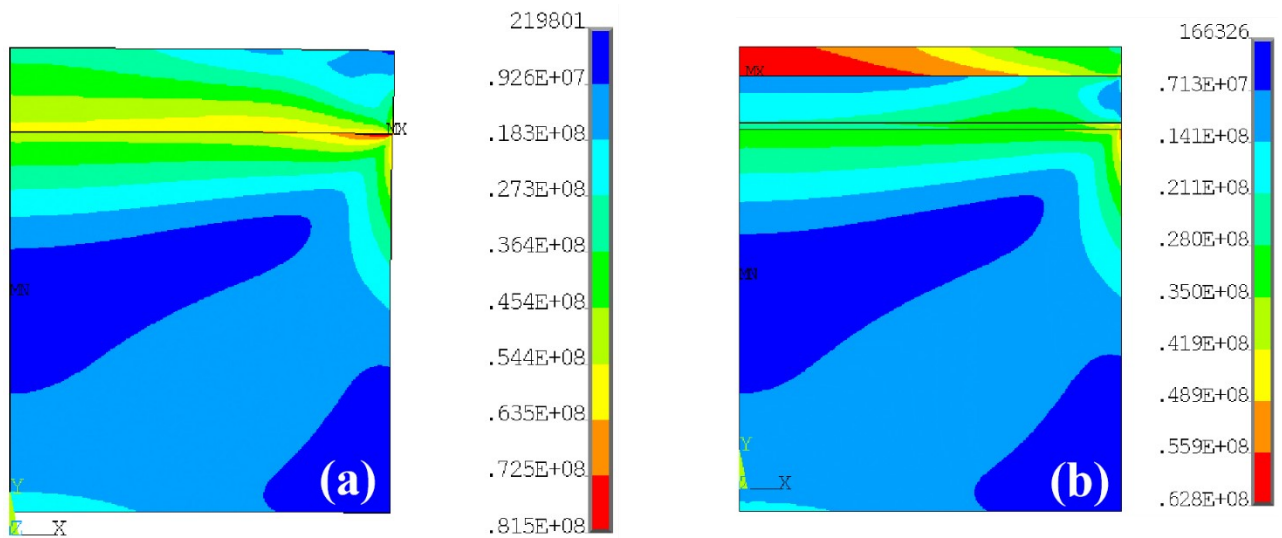

Figure S6. FEM results of residual stress distribution in the coatings: (a) Nb<sub>2</sub>O<sub>5</sub> and (b) M-Nb<sub>2</sub>O<sub>5</sub>.

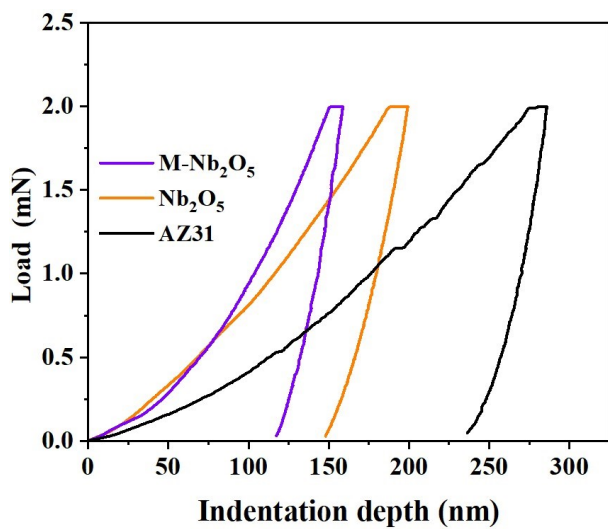

Figure S7. Load-indentation depth curves of naked, Nb<sub>2</sub>O<sub>5</sub> and M-Nb<sub>2</sub>O<sub>5</sub> coated AZ31 specimens.

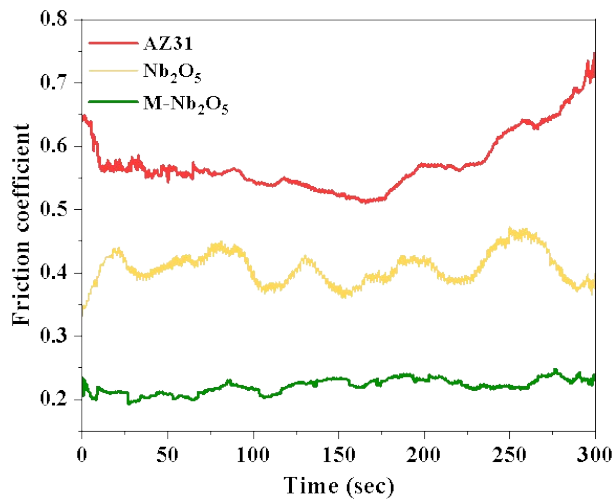

**Figure S8.** COF curves of untreated, Nb<sub>2</sub>O<sub>5</sub>, and M-Nb<sub>2</sub>O<sub>5</sub> coated AZ31 samples.

**Table S1.** Deposition parameters of M-Nb<sub>2</sub>O<sub>5</sub> multilayer coating.

| Deposition parameters    |                                          | Bottom layer<br>(Mg) | Composite interlayer<br>(Nb <sub>2</sub> O <sub>5</sub> -Mg) | Top layer<br>(Nb <sub>2</sub> O <sub>5</sub> ) |
|--------------------------|------------------------------------------|----------------------|--------------------------------------------------------------|------------------------------------------------|
| Sputtering Power<br>(W)  | Mg target                                | 60                   | 15                                                           | /                                              |
|                          | Nb <sub>2</sub> O <sub>5</sub><br>target | /                    | 200                                                          | 250                                            |
| Deposition time (min)    |                                          | 10                   | 320                                                          | 210                                            |
| Ar Gas flow (sccm)       |                                          | 40                   |                                                              |                                                |
| Background pressure (Pa) |                                          | 1×10 <sup>-3</sup>   |                                                              |                                                |

**Table S2.** Performance parameters of layer and matrix materials.

| Materials properties                            | Young's<br>modulus<br>(GPa) | Poisson's<br>ratio | Coefficient<br>of thermal<br>expansion<br>(10 <sup>-6</sup> /K) |
|-------------------------------------------------|-----------------------------|--------------------|-----------------------------------------------------------------|
| AZ31 <sup>1</sup>                               | 45                          | 0.35               | 26.8                                                            |
| Mg <sup>2</sup>                                 | 44.8                        | 0.35               | 25.2                                                            |
| Nb <sub>2</sub> O <sub>5</sub> -Mg <sup>3</sup> | 52.4                        | 0.275              | 15.5                                                            |
| Nb <sub>2</sub> O <sub>5</sub> <sup>4</sup>     | 60                          | 0.2                | 5.8                                                             |

## Reference

- 1 H. Hu, D. Zhang, F. Pan and M. Yang, *J Wuhan Univ Technol*, 2009, **24**, 376-382.
- 2 Taj, B. Prasanth Kumar and K. Vijayasree, *Mater. Today: Proc*, 2017, **4**, 9095-9099.
- 3 H. Guo, S. Gong and H. Xu, *Mater. Sci. Eng.A*, 2002, **325**, 261-269.
- 4 H. C. Chen, C. Y. Huang and P. W. Cheng, *Surf. Coat. Technol*, 2018, **344**, 449-457.

**Table 3S.** Corrosion parameters of naked and coated AZ31 specimens in SBF solution.

| Sample                           | $E_{\text{corr}}$ (V vs.Ag/AgCl) | $i_{\text{corr}}$ (A cm <sup>-2</sup> ) |
|----------------------------------|----------------------------------|-----------------------------------------|
| AZ31                             | -1.63                            | $6.46 \times 10^{-5}$                   |
| Nb <sub>2</sub> O <sub>5</sub>   | -1.54                            | $3.43 \times 10^{-5}$                   |
| M-Nb <sub>2</sub> O <sub>5</sub> | -1.44                            | $4.04 \times 10^{-6}$                   |
